# Supplementary material
Source: PubMed Central journal article supplement (PMC2391053)

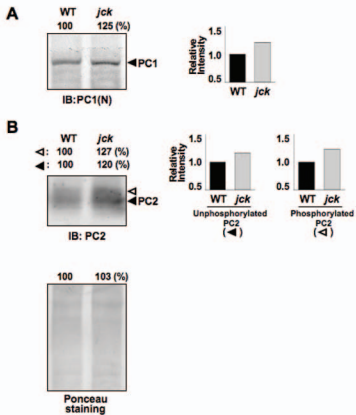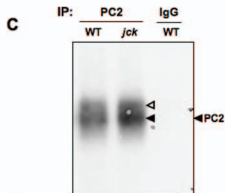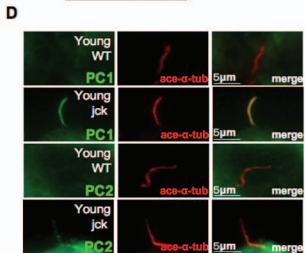

Supplementary Figure 1

Supplement: ASN.2006090985_1.pdf [file ASN.2006090985_1.pdf]
